# Supplementary material
Source: publisher figshare collection journal article supplement (https://sage.figshare.com/ndownloader/files/21110031)
Supplement: Supplementary file 1 [file 21110031]

# Appendix 1. Dementia Diagnosis and Cognitive Impairment Cohorts

|                                                 | Diagnosis of dementia in ICD-10 codes<br>(excluding mild cognitive impairment) |            |       |
|-------------------------------------------------|--------------------------------------------------------------------------------|------------|-------|
| Moderate to severe cognitive impairment (OASIS) | No                                                                             | Yes        | Total |
| No                                              | 4,628 (75.2%)                                                                  | 136 (2.2%) | 4764  |
| Yes                                             | 860 (13.9%)                                                                    | 529 (8.6%) | 1389  |
| Total                                           | 5488                                                                           | 665        | 6,153 |

# Appendix 2: Sample Characteristics by Dementia Diagnosis and Cognitive Impairment Cohorts

| Variable                                                                                                                                              | Entire Sample<br>(6,153)                               | Dementia Diagnosis and Cognitive Impairment Cohorts   |                                                    |                                                   |                                    | p-value |
|-------------------------------------------------------------------------------------------------------------------------------------------------------|--------------------------------------------------------|-------------------------------------------------------|----------------------------------------------------|---------------------------------------------------|------------------------------------|---------|
|                                                                                                                                                       |                                                        | No Dementia Diagnosis                                 |                                                    | Dementia Diagnosis                                |                                    |         |
|                                                                                                                                                       |                                                        | No Cognitive<br>Impairment                            | Cognitive<br>Impairment                            | No<br>Cognitive<br>Impairment                     | Cognitive<br>Impairment            |         |
|                                                                                                                                                       |                                                        | 4628                                                  | 860                                                | 136                                               | 529                                |         |
| Age, mean (S.D.)                                                                                                                                      | 80.1 (9.47)                                            | 78.7 (9.23)                                           | 82.6 (9.49)*                                       | 85.3 (7.93)*                                      | 87.0 (7.15)*                       | <0.0001 |
| Total number of diagnoses, mean (S.D.)                                                                                                                | 9.2 (3.46)                                             | 9.0 (3.48)                                            | 9.4 (3.38)                                         | 10.4 (3.12)*                                      | 9.9 (3.38)*                        | <0.0001 |
| Composite ADL limitation score, mean (S.D.)                                                                                                           | 4.1 (1.28)                                             | 3.9 (1.18)                                            | 4.7 (1.34)*                                        | 4.0 (1.34)                                        | 4.9 (1.37)*                        | <0.0001 |
| Total number of medications, mean (S.D.)                                                                                                              | 13.0 (5.61)                                            | 13.2 (5.58)                                           | 12.8 (5.86)                                        | 12.7 (5.91)                                       | 11.5 (5.28)*                       | <0.0001 |
| Days of index home health admission (median, Q <sub>1</sub> , Q <sub>3</sub> )                                                                        | 29 (17, 48)                                            | 28 (17, 46)                                           | 31 (18, 50)                                        | 33 (16, 53.5)                                     | 30 (18, 51)                        | 0.627   |
| Female, N(%)                                                                                                                                          | 3555 (58%)                                             | 2638 (57%)                                            | 491 (57%)                                          | 82 (60%)                                          | 344 (65%)                          | 0.005   |
| Race/ethnicity, N(%)<br><ul style="list-style-type: none"><li>• Caucasian</li><li>• African American</li><li>• Hispanics</li><li>• Other</li></ul>    | 5323 (86.5%)<br>654 (10.6%)<br>100 (1.6%)<br>76 (1.2%) | 3985 (86.1%)<br>519 (11.2%)<br>71 (1.5%)<br>53 (1.2%) | 755 (87.8%)<br>78 (9.1%)<br>16 (1.9%)<br>11 (1.3%) | 115 (84.5%)<br>16 (11.8%)<br>2 (1.5%)<br>3 (2.2%) | 468 (88.5%)<br>41 (7.8%)           | 0.225   |
| Married, N(%)                                                                                                                                         | 2721 (44%)                                             | 2128 (46%)                                            | 354 (41%)                                          | 46 (34%)                                          | 193 (36%)                          | <0.001  |
| Living arrangement, N(%)<br><ul style="list-style-type: none"><li>• Living with others</li><li>• Living alone</li><li>• Aggregated settings</li></ul> | 3728 (60%)<br>1761 (29%)<br>664 (11%)                  | 2893 (63%)<br>1453 (31%)<br>282 (6%)                  | 505 (59%)<br>228 (27%)<br>127 (15%)                | 70 (51%)<br>29 (21%)<br>37 (27%)                  | 260 (49%)<br>51 (10%)<br>218 (41%) | <0.001  |
| Depressive symptoms, N(%)                                                                                                                             | 2876 (46%)                                             | 1957 (43%)                                            | 511 (59%)                                          | 68 (50%)                                          | 340 (64%)                          | <0.001  |
| Obesity, N(%)                                                                                                                                         | 1368 (22%)                                             | 1102 (23.8%)                                          | 184 (21.4%)                                        | 21 (15.4%)                                        | 61 (11.5%)                         | <0.001  |
| Current Smoking, N(%)                                                                                                                                 | 1150 (19%)                                             | 902 (19.5%)                                           | 179 (20.8%)                                        | 22 (16.2%)                                        | 47 (8.9%)                          | <0.001  |
| Daily interfering pain, N(%)                                                                                                                          | 4334 (70%)                                             | 3374 (72.9%)                                          | 580 (67.4%)                                        | 84 (61.8%)                                        | 296 (55.9%)                        | <0.001  |
| Heart Failure, N(%)                                                                                                                                   | 1208 (20%)                                             | 937 (20.3%)                                           | 164 (19.1%)                                        | 27 (19.9%)                                        | 80 (15.1%)                         | 0.044   |
| Diabetes without complications, N(%)                                                                                                                  | 1094 (18%)                                             | 837 (18.1%)                                           | 163 (18.9%)                                        | 20 (14.7%)                                        | 74 (14.0%)                         | 0.066   |
| Diabetes with complications, N(%)                                                                                                                     | 815 (13%)                                              | 645 (13.9%)                                           | 107 (12.4%)                                        | 14 (10.3%)                                        | 49 (9.3%)                          | 0.013   |

|                                                                                              |              |              |             |             |             |        |
|----------------------------------------------------------------------------------------------|--------------|--------------|-------------|-------------|-------------|--------|
| COPD, N (%)                                                                                  | 1104 (18%)   | 854 (18.5%)  | 177 (20.6%) | 19 (14.0%)  | 54 (10.2%)  | <0.001 |
| Receiving daily caregiver ADL assistance, N(%)                                               | 5129 (83%)   | 3772 (81.5%) | 735 (85.5%) | 115 (84.6%) | 507 (95.8%) | <0.001 |
| Referral source                                                                              |              |              |             |             |             |        |
| • Following acute hospitalization                                                            | 3829 (62.2%) | 3096 (66.9%) | 470 (54.6%) | 58 (42.6%)  | 205 (38.7%) |        |
| • Following post-acute care                                                                  | 768 (12.5%)  | 542 (11.7%)  | 145 (16.9%) | 17 (12.5%)  | 64 (12.1%)  |        |
| • Community                                                                                  | 1556 (25.3%) | 990 (21.4%)  | 245 (28.5%) | 61 (44.9%)  | 260 (49.2%) | <0.001 |
| Index home health admission > 60 days                                                        | 628 (10.2%)  | 479 (10.4%)  | 81 (9.4%)   | 16 (11.8%)  | 52 (9.8%)   | 0.77   |
| Index home health admission > 120 days                                                       | 165 (2.7%)   | 132 (2.8%)   | 19 (2.2%)   | 4 (2.9%)    | 10 (1.9%)   | 0.47   |
| Hospitalization, N(%)                                                                        | 878 (14%)    | 665 (14.4%)  | 158 (18.4%) | 23 (16.9%)  | 63 (11.9%)  | 0.004  |
| Nursing home admission, N(%)                                                                 | 15 (0.2%)    | 7 (0.2%)     | 3 (0.4%)    | 0           | 5 (1.0%)    | 0.005  |
| Inpatient rehabilitation facility admission, N(%)                                            | 27 (0.4%)    | 15 (0.3%)    | 7 (0.8%)    | 2 (1.5%)    | 3 (0.6%)    | 0.053  |
| Composite outcome, N(%)                                                                      | 920 (14.9%)  | 659 (14.2%)  | 165 (19.2%) | 25 (18.4%)  | 71 (13.4%)  | 0.001  |
| Median Survival Time without Facility Admission (Number of days since Home Health Admission) | 192          | 219          | 123         | 304         | 124         | /      |

Note: Groups with significant difference from the reference group (no dementia diagnosis, no cognitive impairment) in ANOVA with post-hoc Tukey HSD test for continuous variables and logistic regression analysis for categorical variables (\*p<0.05, +p<0.01, ++p<0.001).
